# Supplementary material for: Conductivity mechanism of lithium argyrodite solid-state electrolytes
Source: Royal Society of Chemistry journal article supplement (doi:10.1039/d5ta08796a), 2026-01-01
Supplement: d5ta08796a2.xlsx [file d5ta08796a2.xlsx]

## Sheet: Sheet1
paper	figure or table	Sample	general chemical formula	X4d/(X4d+S4d)	LOG 10 (X4d/(X4d+S4d))	Prob X4d/S4d	Log10(Prob X4d/S4d)	X4a/(X4a+S4a)	Log10(X4a/(X4a+S4a) )	Prob X4a/S4a	Log10(Prob X4a/S4a)	Ge/(P+Ge)	Log10(Ge/(P+Ge))	Ge/P	Log10(Ge/P)	ABS(X4d/S4d-X4a/S4a)	Log10(ABS(X4d/S4d-X4a/S4a))			Log (X4d/S4d)				LOG10X/S disorder	Ge/P disorder	LOGGe/P disorder		specific chemical formula	series	glassy or crystalline	temperature (K)	1/T	X/S disorder (Ge=Cl)	LOG X/S disorder (Ge=Cl)			technique used to measure conductivity	preparatation technique	current collectors	Pressure during measurement (Pa)	LOG10 Pressure_measurement	applied pressure of pelletization (MPa)	Applied pressure of pelletization (Pa)	LOG10 Pressure_Pelletization	applied time of pelletization (s)	applied pressure against current collector (Pa)	applied time against current collector (s)	unit cell volume (Ᾰ3)	unit cell volume (m3)
Improvement of the ionic conductivity on new substituted borohydride argyrodites	Figure S2	Li6PS5Cl		0.62	-0.207608	1.63158	0.212608	0.38	-0.420216	0.612903	-0.212608	0.01	-2	0.010101	-1.99564	1.01868	0.00803596			0.212608				-0.207608	0.01	-2		Li6PS5Cl	Li6PS5X	crystalline	233.1	0.00429	0.62	-0.207608			Impedence spectroscopy	mechanic milling then heating	stainless steel	50000000	7.69897	380	380000000	8.57978		380000000		958.585	9.58585e-28
Improvement of the ionic conductivity on new substituted borohydride argyrodites	Figure S2	Li6PS5Cl		0.62	-0.207608	1.63158	0.212608	0.38	-0.420216	0.612903	-0.212608	0.01	-2	0.010101	-1.99564	1.01868	0.00803596			0.212608				-0.207608	0.01	-2		Li6PS5Cl	Li6PS5X	crystalline	242.718	0.00412	0.62	-0.207608			Impedence spectroscopy	mechanic milling then heating	stainless steel	50000000	7.69897	380	380000000	8.57978		380000000		958.585	9.58585e-28
Improvement of the ionic conductivity on new substituted borohydride argyrodites	Figure S2	Li6PS5Cl		0.62	-0.207608	1.63158	0.212608	0.38	-0.420216	0.612903	-0.212608	0.01	-2	0.010101	-1.99564	1.01868	0.00803596			0.212608				-0.207608	0.01	-2		Li6PS5Cl	Li6PS5X	crystalline	252.525	0.00396	0.62	-0.207608			Impedence spectroscopy	mechanic milling then heating	stainless steel	50000000	7.69897	380	380000000	8.57978		380000000		958.585	9.58585e-28
Improvement of the ionic conductivity on new substituted borohydride argyrodites	Figure S2	Li6PS5Cl		0.62	-0.207608	1.63158	0.212608	0.38	-0.420216	0.612903	-0.212608	0.01	-2	0.010101	-1.99564	1.01868	0.00803596			0.212608				-0.207608	0.01	-2		Li6PS5Cl	Li6PS5X	crystalline	262.467	0.00381	0.62	-0.207608			Impedence spectroscopy	mechanic milling then heating	stainless steel	50000000	7.69897	380	380000000	8.57978		380000000		958.585	9.58585e-28
Improvement of the ionic conductivity on new substituted borohydride argyrodites	Figure S2	Li6PS5Cl		0.62	-0.207608	1.63158	0.212608	0.38	-0.420216	0.612903	-0.212608	0.01	-2	0.010101	-1.99564	1.01868	0.00803596			0.212608				-0.207608	0.01	-2		Li6PS5Cl	Li6PS5X	crystalline	273.224	0.00366	0.62	-0.207608			Impedence spectroscopy	mechanic milling then heating	stainless steel	50000000	7.69897	380	380000000	8.57978		380000000		958.585	9.58585e-28
Improvement of the ionic conductivity on new substituted borohydride argyrodites	Figure S2	Li6PS5Cl		0.62	-0.207608	1.63158	0.212608	0.38	-0.420216	0.612903	-0.212608	0.01	-2	0.010101	-1.99564	1.01868	0.00803596			0.212608				-0.207608	0.01	-2		Li6PS5Cl	Li6PS5X	crystalline	283.286	0.00353	0.62	-0.207608			Impedence spectroscopy	mechanic milling then heating	stainless steel	50000000	7.69897	380	380000000	8.57978		380000000		958.585	9.58585e-28
Improvement of the ionic conductivity on new substituted borohydride argyrodites	Figure S2	Li6PS5Cl		0.62	-0.207608	1.63158	0.212608	0.38	-0.420216	0.612903	-0.212608	0.01	-2	0.010101	-1.99564	1.01868	0.00803596			0.212608				-0.207608	0.01	-2		Li6PS5Cl	Li6PS5X	crystalline	293.255	0.00341	0.62	-0.207608			Impedence spectroscopy	mechanic milling then heating	stainless steel	50000000	7.69897	380	380000000	8.57978		380000000		958.585	9.58585e-28
Improvement of the ionic conductivity on new substituted borohydride argyrodites	Figure S2	Li6PS5Cl		0.62	-0.207608	1.63158	0.212608	0.38	-0.420216	0.612903	-0.212608	0.01	-2	0.010101	-1.99564	1.01868	0.00803596			0.212608				-0.207608	0.01	-2		Li6PS5Cl	Li6PS5X	crystalline	297.619	0.00336	0.62	-0.207608			Impedence spectroscopy	mechanic milling then heating	stainless steel	50000000	7.69897	380	380000000	8.57978		380000000		958.585	9.58585e-28
Improvement of the ionic conductivity on new substituted borohydride argyrodites	Figure S2	Li6PS5Cl		0.62	-0.207608	1.63158	0.212608	0.38	-0.420216	0.612903	-0.212608	0.01	-2	0.010101	-1.99564	1.01868	0.00803596			0.212608				-0.207608	0.01	-2		Li6PS5Cl	Li6PS5X	crystalline	303.03	0.0033	0.62	-0.207608			Impedence spectroscopy	mechanic milling then heating	stainless steel	50000000	7.69897	380	380000000	8.57978		380000000		958.585	9.58585e-28
Improvement of the ionic conductivity on new substituted borohydride argyrodites	Figure S2	Li6PS5Cl		0.62	-0.207608	1.63158	0.212608	0.38	-0.420216	0.612903	-0.212608	0.01	-2	0.010101	-1.99564	1.01868	0.00803596			0.212608				-0.207608	0.01	-2		Li6PS5Cl	Li6PS5X	crystalline	312.5	0.0032	0.62	-0.207608			Impedence spectroscopy	mechanic milling then heating	stainless steel	50000000	7.69897	380	380000000	8.57978		380000000		958.585	9.58585e-28
Improvement of the ionic conductivity on new substituted borohydride argyrodites	Figure S2	Li6PS5Cl		0.62	-0.207608	1.63158	0.212608	0.38	-0.420216	0.612903	-0.212608	0.01	-2	0.010101	-1.99564	1.01868	0.00803596			0.212608				-0.207608	0.01	-2		Li6PS5Cl	Li6PS5X	crystalline	322.581	0.0031	0.62	-0.207608			Impedence spectroscopy	mechanic milling then heating	stainless steel	50000000	7.69897	380	380000000	8.57978		380000000		958.585	9.58585e-28
Improvement of the ionic conductivity on new substituted borohydride argyrodites	Figure S2	Li6PS5Cl		0.62	-0.207608	1.63158	0.212608	0.38	-0.420216	0.612903	-0.212608	0.01	-2	0.010101	-1.99564	1.01868	0.00803596			0.212608				-0.207608	0.01	-2		Li6PS5Cl	Li6PS5X	crystalline	333.333	0.003	0.62	-0.207608			Impedence spectroscopy	mechanic milling then heating	stainless steel	50000000	7.69897	380	380000000	8.57978		380000000		958.585	9.58585e-28
Improvement of the ionic conductivity on new substituted borohydride argyrodites	Figure S2	Li6PS5Br0.75I0.25		0.16	-0.79588	0.190476	-0.720159	0.84	-0.0757207	5.25	0.720159	0.01	-2	0.010101	-1.99564	5.05952	0.70411			-0.720159				-0.79588	0.01	-2		Li6PS5Br0.75I0.25	Li6PS5X	crystalline	233.1	0.00429	0.16	-0.79588			Impedence spectroscopy	mechanic milling then heating	stainless steel	50000000	7.69897	380	380000000	8.57978		380000000		1015.08	1.01508e-27
Improvement of the ionic conductivity on new substituted borohydride argyrodites	Figure S2	Li6PS5Br0.75I0.25		0.16	-0.79588	0.190476	-0.720159	0.84	-0.0757207	5.25	0.720159	0.01	-2	0.010101	-1.99564	5.05952	0.70411			-0.720159				-0.79588	0.01	-2		Li6PS5Br0.75I0.25	Li6PS5X	crystalline	242.718	0.00412	0.16	-0.79588			Impedence spectroscopy	mechanic milling then heating	stainless steel	50000000	7.69897	380	380000000	8.57978		380000000		1015.08	1.01508e-27
Improvement of the ionic conductivity on new substituted borohydride argyrodites	Figure S2	Li6PS5Br0.75I0.25		0.16	-0.79588	0.190476	-0.720159	0.84	-0.0757207	5.25	0.720159	0.01	-2	0.010101	-1.99564	5.05952	0.70411			-0.720159				-0.79588	0.01	-2		Li6PS5Br0.75I0.25	Li6PS5X	crystalline	252.525	0.00396	0.16	-0.79588			Impedence spectroscopy	mechanic milling then heating	stainless steel	50000000	7.69897	380	380000000	8.57978		380000000		1015.08	1.01508e-27
Improvement of the ionic conductivity on new substituted borohydride argyrodites	Figure S2	Li6PS5Br0.75I0.25		0.16	-0.79588	0.190476	-0.720159	0.84	-0.0757207	5.25	0.720159	0.01	-2	0.010101	-1.99564	5.05952	0.70411			-0.720159				-0.79588	0.01	-2		Li6PS5Br0.75I0.25	Li6PS5X	crystalline	262.467	0.00381	0.16	-0.79588			Impedence spectroscopy	mechanic milling then heating	stainless steel	50000000	7.69897	380	380000000	8.57978		380000000		1015.08	1.01508e-27
Improvement of the ionic conductivity on new substituted borohydride argyrodites	Figure S2	Li6PS5Br0.75I0.25		0.16	-0.79588	0.190476	-0.720159	0.84	-0.0757207	5.25	0.720159	0.01	-2	0.010101	-1.99564	5.05952	0.70411			-0.720159				-0.79588	0.01	-2		Li6PS5Br0.75I0.25	Li6PS5X	crystalline	273.224	0.00366	0.16	-0.79588			Impedence spectroscopy	mechanic milling then heating	stainless steel	50000000	7.69897	380	380000000	8.57978		380000000		1015.08	1.01508e-27
Improvement of the ionic conductivity on new substituted borohydride argyrodites	Figure S2	Li6PS5Br0.75I0.25		0.16	-0.79588	0.190476	-0.720159	0.84	-0.0757207	5.25	0.720159	0.01	-2	0.010101	-1.99564	5.05952	0.70411			-0.720159				-0.79588	0.01	-2		Li6PS5Br0.75I0.25	Li6PS5X	crystalline	283.286	0.00353	0.16	-0.79588			Impedence spectroscopy	mechanic milling then heating	stainless steel	50000000	7.69897	380	380000000	8.57978		380000000		1015.08	1.01508e-27
Improvement of the ionic conductivity on new substituted borohydride argyrodites	Figure S2	Li6PS5Br0.75I0.25		0.16	-0.79588	0.190476	-0.720159	0.84	-0.0757207	5.25	0.720159	0.01	-2	0.010101	-1.99564	5.05952	0.70411			-0.720159				-0.79588	0.01	-2		Li6PS5Br0.75I0.25	Li6PS5X	crystalline	293.255	0.00341	0.16	-0.79588			Impedence spectroscopy	mechanic milling then heating	stainless steel	50000000	7.69897	380	380000000	8.57978		380000000		1015.08	1.01508e-27
Improvement of the ionic conductivity on new substituted borohydride argyrodites	Figure S2	Li6PS5Br0.75I0.25		0.16	-0.79588	0.190476	-0.720159	0.84	-0.0757207	5.25	0.720159	0.01	-2	0.010101	-1.99564	5.05952	0.70411			-0.720159				-0.79588	0.01	-2		Li6PS5Br0.75I0.25	Li6PS5X	crystalline	297.619	0.00336	0.16	-0.79588			Impedence spectroscopy	mechanic milling then heating	stainless steel	50000000	7.69897	380	380000000	8.57978		380000000		1015.08	1.01508e-27
Improvement of the ionic conductivity on new substituted borohydride argyrodites	Figure S2	Li6PS5Br0.75I0.25		0.16	-0.79588	0.190476	-0.720159	0.84	-0.0757207	5.25	0.720159	0.01	-2	0.010101	-1.99564	5.05952	0.70411			-0.720159				-0.79588	0.01	-2		Li6PS5Br0.75I0.25	Li6PS5X	crystalline	303.03	0.0033	0.16	-0.79588			Impedence spectroscopy	mechanic milling then heating	stainless steel	50000000	7.69897	380	380000000	8.57978		380000000		1015.08	1.01508e-27
Improvement of the ionic conductivity on new substituted borohydride argyrodites	Figure S2	Li6PS5Br0.75I0.25		0.16	-0.79588	0.190476	-0.720159	0.84	-0.0757207	5.25	0.720159	0.01	-2	0.010101	-1.99564	5.05952	0.70411			-0.720159				-0.79588	0.01	-2		Li6PS5Br0.75I0.25	Li6PS5X	crystalline	312.5	0.0032	0.16	-0.79588			Impedence spectroscopy	mechanic milling then heating	stainless steel	50000000	7.69897	380	380000000	8.57978		380000000		1015.08	1.01508e-27
Improvement of the ionic conductivity on new substituted borohydride argyrodites	Figure S2	Li6PS5Br0.75I0.25		0.16	-0.79588	0.190476	-0.720159	0.84	-0.0757207	5.25	0.720159	0.01	-2	0.010101	-1.99564	5.05952	0.70411			-0.720159				-0.79588	0.01	-2		Li6PS5Br0.75I0.25	Li6PS5X	crystalline	322.581	0.0031	0.16	-0.79588			Impedence spectroscopy	mechanic milling then heating	stainless steel	50000000	7.69897	380	380000000	8.57978		380000000		1015.08	1.01508e-27
Improvement of the ionic conductivity on new substituted borohydride argyrodites	Figure S2	Li6PS5Br0.75I0.25		0.16	-0.79588	0.190476	-0.720159	0.84	-0.0757207	5.25	0.720159	0.01	-2	0.010101	-1.99564	5.05952	0.70411			-0.720159				-0.79588	0.01	-2		Li6PS5Br0.75I0.25	Li6PS5X	crystalline	333.333	0.003	0.16	-0.79588			Impedence spectroscopy	mechanic milling then heating	stainless steel	50000000	7.69897	380	380000000	8.57978		380000000		1015.08	1.01508e-27
Improvement of the ionic conductivity on new substituted borohydride argyrodites	Figure S2	Li6PS5Br0.25I0.75		0.02	-1.69897	0.0204082	-1.6902	0.98	-0.00877392	49	1.6902	0.01	-2	0.010101	-1.99564	48.9796	1.69002			-1.6902				-1.69897	0.02	-1.69897		Li6PS5Br0.25I0.75	Li6PS5X	crystalline	233.1	0.00429	0.03	-1.52288			Impedence spectroscopy	mechanic milling then heating	stainless steel	50000000	7.69897	380	380000000	8.57978		380000000		1036.43	1.03643e-27
Improvement of the ionic conductivity on new substituted borohydride argyrodites	Figure S2	Li6PS5Br0.25I0.75		0.02	-1.69897	0.0204082	-1.6902	0.98	-0.00877392	49	1.6902	0.01	-2	0.010101	-1.99564	48.9796	1.69002			-1.6902				-1.69897	0.02	-1.69897		Li6PS5Br0.25I0.75	Li6PS5X	crystalline	242.718	0.00412	0.03	-1.52288			Impedence spectroscopy	mechanic milling then heating	stainless steel	50000000	7.69897	380	380000000	8.57978		380000000		1036.43	1.03643e-27
Improvement of the ionic conductivity on new substituted borohydride argyrodites	Figure S2	Li6PS5Br0.25I0.75		0.02	-1.69897	0.0204082	-1.6902	0.98	-0.00877392	49	1.6902	0.01	-2	0.010101	-1.99564	48.9796	1.69002			-1.6902				-1.69897	0.02	-1.69897		Li6PS5Br0.25I0.75	Li6PS5X	crystalline	252.525	0.00396	0.03	-1.52288			Impedence spectroscopy	mechanic milling then heating	stainless steel	50000000	7.69897	380	380000000	8.57978		380000000		1036.43	1.03643e-27
Improvement of the ionic conductivity on new substituted borohydride argyrodites	Figure S2	Li6PS5Br0.25I0.75		0.02	-1.69897	0.0204082	-1.6902	0.98	-0.00877392	49	1.6902	0.01	-2	0.010101	-1.99564	48.9796	1.69002			-1.6902				-1.69897	0.02	-1.69897		Li6PS5Br0.25I0.75	Li6PS5X	crystalline	262.467	0.00381	0.03	-1.52288			Impedence spectroscopy	mechanic milling then heating	stainless steel	50000000	7.69897	380	380000000	8.57978		380000000		1036.43	1.03643e-27
Improvement of the ionic conductivity on new substituted borohydride argyrodites	Figure S2	Li6PS5Br0.25I0.75		0.02	-1.69897	0.0204082	-1.6902	0.98	-0.00877392	49	1.6902	0.01	-2	0.010101	-1.99564	48.9796	1.69002			-1.6902				-1.69897	0.02	-1.69897		Li6PS5Br0.25I0.75	Li6PS5X	crystalline	273.224	0.00366	0.03	-1.52288			Impedence spectroscopy	mechanic milling then heating	stainless steel	50000000	7.69897	380	380000000	8.57978		380000000		1036.43	1.03643e-27
Improvement of the ionic conductivity on new substituted borohydride argyrodites	Figure S2	Li6PS5Br0.25I0.75		0.02	-1.69897	0.0204082	-1.6902	0.98	-0.00877392	49	1.6902	0.01	-2	0.010101	-1.99564	48.9796	1.69002			-1.6902				-1.69897	0.02	-1.69897		Li6PS5Br0.25I0.75	Li6PS5X	crystalline	283.286	0.00353	0.03	-1.52288			Impedence spectroscopy	mechanic milling then heating	stainless steel	50000000	7.69897	380	380000000	8.57978		380000000		1036.43	1.03643e-27
Improvement of the ionic conductivity on new substituted borohydride argyrodites	Figure S2	Li6PS5Br0.25I0.75		0.02	-1.69897	0.0204082	-1.6902	0.98	-0.00877392	49	1.6902	0.01	-2	0.010101	-1.99564	48.9796	1.69002			-1.6902				-1.69897	0.02	-1.69897		Li6PS5Br0.25I0.75	Li6PS5X	crystalline	293.255	0.00341	0.03	-1.52288			Impedence spectroscopy	mechanic milling then heating	stainless steel	50000000	7.69897	380	380000000	8.57978		380000000		1036.43	1.03643e-27
Improvement of the ionic conductivity on new substituted borohydride argyrodites	Figure S2	Li6PS5Br0.25I0.75		0.02	-1.69897	0.0204082	-1.6902	0.98	-0.00877392	49	1.6902	0.01	-2	0.010101	-1.99564	48.9796	1.69002			-1.6902				-1.69897	0.02	-1.69897		Li6PS5Br0.25I0.75	Li6PS5X	crystalline	297.619	0.00336	0.03	-1.52288			Impedence spectroscopy	mechanic milling then heating	stainless steel	50000000	7.69897	380	380000000	8.57978		380000000		1036.43	1.03643e-27
Improvement of the ionic conductivity on new substituted borohydride argyrodites	Figure S2	Li6PS5Br0.25I0.75		0.02	-1.69897	0.0204082	-1.6902	0.98	-0.00877392	49	1.6902	0.01	-2	0.010101	-1.99564	48.9796	1.69002			-1.6902				-1.69897	0.02	-1.69897		Li6PS5Br0.25I0.75	Li6PS5X	crystalline	303.03	0.0033	0.03	-1.52288			Impedence spectroscopy	mechanic milling then heating	stainless steel	50000000	7.69897	380	380000000	8.57978		380000000		1036.43	1.03643e-27
Improvement of the ionic conductivity on new substituted borohydride argyrodites	Figure S2	Li6PS5Br0.25I0.75		0.02	-1.69897	0.0204082	-1.6902	0.98	-0.00877392	49	1.6902	0.01	-2	0.010101	-1.99564	48.9796	1.69002			-1.6902				-1.69897	0.02	-1.69897		Li6PS5Br0.25I0.75	Li6PS5X	crystalline	312.5	0.0032	0.03	-1.52288			Impedence spectroscopy	mechanic milling then heating	stainless steel	50000000	7.69897	380	380000000	8.57978		380000000		1036.43	1.03643e-27
Improvement of the ionic conductivity on new substituted borohydride argyrodites	Figure S2	Li6PS5Br0.25I0.75		0.02	-1.69897	0.0204082	-1.6902	0.98	-0.00877392	49	1.6902	0.01	-2	0.010101	-1.99564	48.9796	1.69002			-1.6902				-1.69897	0.02	-1.69897		Li6PS5Br0.25I0.75	Li6PS5X	crystalline	322.581	0.0031	0.03	-1.52288			Impedence spectroscopy	mechanic milling then heating	stainless steel	50000000	7.69897	380	380000000	8.57978		380000000		1036.43	1.03643e-27
Improvement of the ionic conductivity on new substituted borohydride argyrodites	Figure S2	Li6PS5Br0.25I0.75		0.02	-1.69897	0.0204082	-1.6902	0.98	-0.00877392	49	1.6902	0.01	-2	0.010101	-1.99564	48.9796	1.69002			-1.6902				-1.69897	0.02	-1.69897		Li6PS5Br0.25I0.75	Li6PS5X	crystalline	333.333	0.003	0.03	-1.52288			Impedence spectroscopy	mechanic milling then heating	stainless steel	50000000	7.69897	380	380000000	8.57978		380000000		1036.43	1.03643e-27
Improvement of the ionic conductivity on new substituted borohydride argyrodites	Figure S2	Li6PS5I		0.01	-2	0.010101	-1.99564	0.99	-0.00436481	99	1.99564	0.01	-2	0.010101	-1.99564	98.9899	1.99559			-1.99564				-2	0.02	-1.69897		Li6PS5I	Li6PS5X	crystalline	233.1	0.00429	0.02	-1.69897			Impedence spectroscopy	mechanic milling then heating	stainless steel	50000000	7.69897	380	380000000	8.57978		380000000		1042.59	1.04259e-27
Improvement of the ionic conductivity on new substituted borohydride argyrodites	Figure S2	Li6PS5I		0.01	-2	0.010101	-1.99564	0.99	-0.00436481	99	1.99564	0.01	-2	0.010101	-1.99564	98.9899	1.99559			-1.99564				-2	0.02	-1.69897		Li6PS5I	Li6PS5X	crystalline	242.718	0.00412	0.02	-1.69897			Impedence spectroscopy	mechanic milling then heating	stainless steel	50000000	7.69897	380	380000000	8.57978		380000000		1042.59	1.04259e-27
Improvement of the ionic conductivity on new substituted borohydride argyrodites	Figure S2	Li6PS5I		0.01	-2	0.010101	-1.99564	0.99	-0.00436481	99	1.99564	0.01	-2	0.010101	-1.99564	98.9899	1.99559			-1.99564				-2	0.02	-1.69897		Li6PS5I	Li6PS5X	crystalline	252.525	0.00396	0.02	-1.69897			Impedence spectroscopy	mechanic milling then heating	stainless steel	50000000	7.69897	380	380000000	8.57978		380000000		1042.59	1.04259e-27
Improvement of the ionic conductivity on new substituted borohydride argyrodites	Figure S2	Li6PS5I		0.01	-2	0.010101	-1.99564	0.99	-0.00436481	99	1.99564	0.01	-2	0.010101	-1.99564	98.9899	1.99559			-1.99564				-2	0.02	-1.69897		Li6PS5I	Li6PS5X	crystalline	262.467	0.00381	0.02	-1.69897			Impedence spectroscopy	mechanic milling then heating	stainless steel	50000000	7.69897	380	380000000	8.57978		380000000		1042.59	1.04259e-27
Improvement of the ionic conductivity on new substituted borohydride argyrodites	Figure S2	Li6PS5I		0.01	-2	0.010101	-1.99564	0.99	-0.00436481	99	1.99564	0.01	-2	0.010101	-1.99564	98.9899	1.99559			-1.99564				-2	0.02	-1.69897		Li6PS5I	Li6PS5X	crystalline	273.224	0.00366	0.02	-1.69897			Impedence spectroscopy	mechanic milling then heating	stainless steel	50000000	7.69897	380	380000000	8.57978		380000000		1042.59	1.04259e-27
Improvement of the ionic conductivity on new substituted borohydride argyrodites	Figure S2	Li6PS5I		0.01	-2	0.010101	-1.99564	0.99	-0.00436481	99	1.99564	0.01	-2	0.010101	-1.99564	98.9899	1.99559			-1.99564				-2	0.02	-1.69897		Li6PS5I	Li6PS5X	crystalline	283.286	0.00353	0.02	-1.69897			Impedence spectroscopy	mechanic milling then heating	stainless steel	50000000	7.69897	380	380000000	8.57978		380000000		1042.59	1.04259e-27
Improvement of the ionic conductivity on new substituted borohydride argyrodites	Figure S2	Li6PS5I		0.01	-2	0.010101	-1.99564	0.99	-0.00436481	99	1.99564	0.01	-2	0.010101	-1.99564	98.9899	1.99559			-1.99564				-2	0.02	-1.69897		Li6PS5I	Li6PS5X	crystalline	293.255	0.00341	0.02	-1.69897			Impedence spectroscopy	mechanic milling then heating	stainless steel	50000000	7.69897	380	380000000	8.57978		380000000		1042.59	1.04259e-27
Improvement of the ionic conductivity on new substituted borohydride argyrodites	Figure S2	Li6PS5I		0.01	-2	0.010101	-1.99564	0.99	-0.00436481	99	1.99564	0.01	-2	0.010101	-1.99564	98.9899	1.99559			-1.99564				-2	0.02	-1.69897		Li6PS5I	Li6PS5X	crystalline	297.619	0.00336	0.02	-1.69897			Impedence spectroscopy	mechanic milling then heating	stainless steel	50000000	7.69897	380	380000000	8.57978		380000000		1042.59	1.04259e-27
Improvement of the ionic conductivity on new substituted borohydride argyrodites	Figure S2	Li6PS5I		0.01	-2	0.010101	-1.99564	0.99	-0.00436481	99	1.99564	0.01	-2	0.010101	-1.99564	98.9899	1.99559			-1.99564				-2	0.02	-1.69897		Li6PS5I	Li6PS5X	crystalline	303.03	0.0033	0.02	-1.69897			Impedence spectroscopy	mechanic milling then heating	stainless steel	50000000	7.69897	380	380000000	8.57978		380000000		1042.59	1.04259e-27
Improvement of the ionic conductivity on new substituted borohydride argyrodites	Figure S2	Li6PS5I		0.01	-2	0.010101	-1.99564	0.99	-0.00436481	99	1.99564	0.01	-2	0.010101	-1.99564	98.9899	1.99559			-1.99564				-2	0.02	-1.69897		Li6PS5I	Li6PS5X	crystalline	312.5	0.0032	0.02	-1.69897			Impedence spectroscopy	mechanic milling then heating	stainless steel	50000000	7.69897	380	380000000	8.57978		380000000		1042.59	1.04259e-27
Improvement of the ionic conductivity on new substituted borohydride argyrodites	Figure S2	Li6PS5I		0.01	-2	0.010101	-1.99564	0.99	-0.00436481	99	1.99564	0.01	-2	0.010101	-1.99564	98.9899	1.99559			-1.99564				-2	0.02	-1.69897		Li6PS5I	Li6PS5X	crystalline	322.581	0.0031	0.02	-1.69897			Impedence spectroscopy	mechanic milling then heating	stainless steel	50000000	7.69897	380	380000000	8.57978		380000000		1042.59	1.04259e-27
Improvement of the ionic conductivity on new substituted borohydride argyrodites	Figure S2	Li6PS5I		0.01	-2	0.010101	-1.99564	0.99	-0.00436481	99	1.99564	0.01	-2	0.010101	-1.99564	98.9899	1.99559			-1.99564				-2	0.02	-1.69897		Li6PS5I	Li6PS5X	crystalline	333.333	0.003	0.02	-1.69897			Impedence spectroscopy	mechanic milling then heating	stainless steel	50000000	7.69897	380	380000000	8.57978		380000000		1042.59	1.04259e-27
Improvement of the ionic conductivity on new substituted borohydride argyrodites	Figure S3	Li6PS5Cl		0.62	-0.207608	1.63158	0.212608	0.38	-0.420216	0.612903	-0.212608	0.01	-2	0.010101	-1.99564	1.01868	0.00803596			0.212608				-0.207608	0.01	-2		Li6PS5Cl	Li6PS5X	crystalline	253.165	0.00395	0.62	-0.207608			Impedence spectroscopy	mechanic milling then heating	stainless steel			375	375000000	8.57403		375000000		958.585	9.58585e-28
Improvement of the ionic conductivity on new substituted borohydride argyrodites	Figure S3	Li6PS5Cl		0.62	-0.207608	1.63158	0.212608	0.38	-0.420216	0.612903	-0.212608	0.01	-2	0.010101	-1.99564	1.01868	0.00803596			0.212608				-0.207608	0.01	-2		Li6PS5Cl	Li6PS5X	crystalline	263.158	0.0038	0.62	-0.207608			Impedence spectroscopy	mechanic milling then heating	stainless steel			375	375000000	8.57403		375000000		958.585	9.58585e-28
Improvement of the ionic conductivity on new substituted borohydride argyrodites	Figure S3	Li6PS5Cl		0.62	-0.207608	1.63158	0.212608	0.38	-0.420216	0.612903	-0.212608	0.01	-2	0.010101	-1.99564	1.01868	0.00803596			0.212608				-0.207608	0.01	-2		Li6PS5Cl	Li6PS5X	crystalline	273.224	0.00366	0.62	-0.207608			Impedence spectroscopy	mechanic milling then heating	stainless steel			375	375000000	8.57403		375000000		958.585	9.58585e-28
Improvement of the ionic conductivity on new substituted borohydride argyrodites	Figure S3	Li6PS5Cl		0.62	-0.207608	1.63158	0.212608	0.38	-0.420216	0.612903	-0.212608	0.01	-2	0.010101	-1.99564	1.01868	0.00803596			0.212608				-0.207608	0.01	-2		Li6PS5Cl	Li6PS5X	crystalline	283.286	0.00353	0.62	-0.207608			Impedence spectroscopy	mechanic milling then heating	stainless steel			375	375000000	8.57403		375000000		958.585	9.58585e-28
Improvement of the ionic conductivity on new substituted borohydride argyrodites	Figure S3	Li6PS5Cl		0.62	-0.207608	1.63158	0.212608	0.38	-0.420216	0.612903	-0.212608	0.01	-2	0.010101	-1.99564	1.01868	0.00803596			0.212608				-0.207608	0.01	-2		Li6PS5Cl	Li6PS5X	crystalline	293.255	0.00341	0.62	-0.207608			Impedence spectroscopy	mechanic milling then heating	stainless steel			375	375000000	8.57403		375000000		958.585	9.58585e-28
Improvement of the ionic conductivity on new substituted borohydride argyrodites	Figure S3	Li6PS5Cl		0.62	-0.207608	1.63158	0.212608	0.38	-0.420216	0.612903	-0.212608	0.01	-2	0.010101	-1.99564	1.01868	0.00803596			0.212608				-0.207608	0.01	-2		Li6PS5Cl	Li6PS5X	crystalline	303.03	0.0033	0.62	-0.207608			Impedence spectroscopy	mechanic milling then heating	stainless steel			375	375000000	8.57403		375000000		958.585	9.58585e-28
Improvement of the ionic conductivity on new substituted borohydride argyrodites	Figure S3	Li6PS5Cl		0.62	-0.207608	1.63158	0.212608	0.38	-0.420216	0.612903	-0.212608	0.01	-2	0.010101	-1.99564	1.01868	0.00803596			0.212608				-0.207608	0.01	-2		Li6PS5Cl	Li6PS5X	crystalline	312.5	0.0032	0.62	-0.207608			Impedence spectroscopy	mechanic milling then heating	stainless steel			375	375000000	8.57403		375000000		958.585	9.58585e-28
Improvement of the ionic conductivity on new substituted borohydride argyrodites	Figure S3	Li6PS5Cl		0.62	-0.207608	1.63158	0.212608	0.38	-0.420216	0.612903	-0.212608	0.01	-2	0.010101	-1.99564	1.01868	0.00803596			0.212608				-0.207608	0.01	-2		Li6PS5Cl	Li6PS5X	crystalline	322.581	0.0031	0.62	-0.207608			Impedence spectroscopy	mechanic milling then heating	stainless steel			375	375000000	8.57403		375000000		958.585	9.58585e-28
Improvement of the ionic conductivity on new substituted borohydride argyrodites	Figure S3	Li6PS5Cl		0.62	-0.207608	1.63158	0.212608	0.38	-0.420216	0.612903	-0.212608	0.01	-2	0.010101	-1.99564	1.01868	0.00803596			0.212608				-0.207608	0.01	-2		Li6PS5Cl	Li6PS5X	crystalline	333.333	0.003	0.62	-0.207608			Impedence spectroscopy	mechanic milling then heating	stainless steel			375	375000000	8.57403		375000000		958.585	9.58585e-28
Improvement of the ionic conductivity on new substituted borohydride argyrodites	Figure S3	Li6PS5Cl		0.62	-0.207608	1.63158	0.212608	0.38	-0.420216	0.612903	-0.212608	0.01	-2	0.010101	-1.99564	1.01868	0.00803596			0.212608				-0.207608	0.01	-2		Li6PS5Cl	Li6PS5X	crystalline	343.643	0.00291	0.62	-0.207608			Impedence spectroscopy	mechanic milling then heating	stainless steel			375	375000000	8.57403		375000000		958.585	9.58585e-28
Improvement of the ionic conductivity on new substituted borohydride argyrodites	Figure S3	Li6PS5Cl		0.62	-0.207608	1.63158	0.212608	0.38	-0.420216	0.612903	-0.212608	0.01	-2	0.010101	-1.99564	1.01868	0.00803596			0.212608				-0.207608	0.01	-2		Li6PS5Cl	Li6PS5X	crystalline	353.357	0.00283	0.62	-0.207608			Impedence spectroscopy	mechanic milling then heating	stainless steel			375	375000000	8.57403		375000000		958.585	9.58585e-28
Improvement of the ionic conductivity on new substituted borohydride argyrodites	Figure S3	Li6PS5Cl		0.62	-0.207608	1.63158	0.212608	0.38	-0.420216	0.612903	-0.212608	0.01	-2	0.010101	-1.99564	1.01868	0.00803596			0.212608				-0.207608	0.01	-2		Li6PS5Cl	Li6PS5X	crystalline	363.636	0.00275	0.62	-0.207608			Impedence spectroscopy	mechanic milling then heating	stainless steel			375	375000000	8.57403		375000000		958.585	9.58585e-28
Improvement of the ionic conductivity on new substituted borohydride argyrodites	Figure S3	Li6PS5Br0.75I0.25		0.16	-0.79588	0.190476	-0.720159	0.84	-0.0757207	5.25	0.720159	0.01	-2	0.010101	-1.99564	5.05952	0.70411			-0.720159				-0.79588	0.01	-2		Li6PS5Br0.75I0.25	Li6PS5X	crystalline	253.165	0.00395	0.16	-0.79588			Impedence spectroscopy	mechanic milling then heating	stainless steel			375	375000000	8.57403		375000000		1015.08	1.01508e-27
Improvement of the ionic conductivity on new substituted borohydride argyrodites	Figure S3	Li6PS5Br0.75I0.25		0.16	-0.79588	0.190476	-0.720159	0.84	-0.0757207	5.25	0.720159	0.01	-2	0.010101	-1.99564	5.05952	0.70411			-0.720159				-0.79588	0.01	-2		Li6PS5Br0.75I0.25	Li6PS5X	crystalline	263.158	0.0038	0.16	-0.79588			Impedence spectroscopy	mechanic milling then heating	stainless steel			375	375000000	8.57403		375000000		1015.08	1.01508e-27
Improvement of the ionic conductivity on new substituted borohydride argyrodites	Figure S3	Li6PS5Br0.75I0.25		0.16	-0.79588	0.190476	-0.720159	0.84	-0.0757207	5.25	0.720159	0.01	-2	0.010101	-1.99564	5.05952	0.70411			-0.720159				-0.79588	0.01	-2		Li6PS5Br0.75I0.25	Li6PS5X	crystalline	273.224	0.00366	0.16	-0.79588			Impedence spectroscopy	mechanic milling then heating	stainless steel			375	375000000	8.57403		375000000		1015.08	1.01508e-27
Improvement of the ionic conductivity on new substituted borohydride argyrodites	Figure S3	Li6PS5Br0.75I0.25		0.16	-0.79588	0.190476	-0.720159	0.84	-0.0757207	5.25	0.720159	0.01	-2	0.010101	-1.99564	5.05952	0.70411			-0.720159				-0.79588	0.01	-2		Li6PS5Br0.75I0.25	Li6PS5X	crystalline	283.286	0.00353	0.16	-0.79588			Impedence spectroscopy	mechanic milling then heating	stainless steel			375	375000000	8.57403		375000000		1015.08	1.01508e-27
Improvement of the ionic conductivity on new substituted borohydride argyrodites	Figure S3	Li6PS5Br0.75I0.25		0.16	-0.79588	0.190476	-0.720159	0.84	-0.0757207	5.25	0.720159	0.01	-2	0.010101	-1.99564	5.05952	0.70411			-0.720159				-0.79588	0.01	-2		Li6PS5Br0.75I0.25	Li6PS5X	crystalline	293.255	0.00341	0.16	-0.79588			Impedence spectroscopy	mechanic milling then heating	stainless steel			375	375000000	8.57403		375000000		1015.08	1.01508e-27
Improvement of the ionic conductivity on new substituted borohydride argyrodites	Figure S3	Li6PS5Br0.75I0.25		0.16	-0.79588	0.190476	-0.720159	0.84	-0.0757207	5.25	0.720159	0.01	-2	0.010101	-1.99564	5.05952	0.70411			-0.720159				-0.79588	0.01	-2		Li6PS5Br0.75I0.25	Li6PS5X	crystalline	303.03	0.0033	0.16	-0.79588			Impedence spectroscopy	mechanic milling then heating	stainless steel			375	375000000	8.57403		375000000		1015.08	1.01508e-27
Improvement of the ionic conductivity on new substituted borohydride argyrodites	Figure S3	Li6PS5Br0.75I0.25		0.16	-0.79588	0.190476	-0.720159	0.84	-0.0757207	5.25	0.720159	0.01	-2	0.010101	-1.99564	5.05952	0.70411			-0.720159				-0.79588	0.01	-2		Li6PS5Br0.75I0.25	Li6PS5X	crystalline	312.5	0.0032	0.16	-0.79588			Impedence spectroscopy	mechanic milling then heating	stainless steel			375	375000000	8.57403		375000000		1015.08	1.01508e-27
Improvement of the ionic conductivity on new substituted borohydride argyrodites	Figure S3	Li6PS5Br0.75I0.25		0.16	-0.79588	0.190476	-0.720159	0.84	-0.0757207	5.25	0.720159	0.01	-2	0.010101	-1.99564	5.05952	0.70411			-0.720159				-0.79588	0.01	-2		Li6PS5Br0.75I0.25	Li6PS5X	crystalline	322.581	0.0031	0.16	-0.79588			Impedence spectroscopy	mechanic milling then heating	stainless steel			375	375000000	8.57403		375000000		1015.08	1.01508e-27
Improvement of the ionic conductivity on new substituted borohydride argyrodites	Figure S3	Li6PS5Br0.75I0.25		0.16	-0.79588	0.190476	-0.720159	0.84	-0.0757207	5.25	0.720159	0.01	-2	0.010101	-1.99564	5.05952	0.70411			-0.720159				-0.79588	0.01	-2		Li6PS5Br0.75I0.25	Li6PS5X	crystalline	333.333	0.003	0.16	-0.79588			Impedence spectroscopy	mechanic milling then heating	stainless steel			375	375000000	8.57403		375000000		1015.08	1.01508e-27
Improvement of the ionic conductivity on new substituted borohydride argyrodites	Figure S3	Li6PS5Br0.75I0.25		0.16	-0.79588	0.190476	-0.720159	0.84	-0.0757207	5.25	0.720159	0.01	-2	0.010101	-1.99564	5.05952	0.70411			-0.720159				-0.79588	0.01	-2		Li6PS5Br0.75I0.25	Li6PS5X	crystalline	343.643	0.00291	0.16	-0.79588			Impedence spectroscopy	mechanic milling then heating	stainless steel			375	375000000	8.57403		375000000		1015.08	1.01508e-27
Improvement of the ionic conductivity on new substituted borohydride argyrodites	Figure S3	Li6PS5Br0.75I0.25		0.16	-0.79588	0.190476	-0.720159	0.84	-0.0757207	5.25	0.720159	0.01	-2	0.010101	-1.99564	5.05952	0.70411			-0.720159				-0.79588	0.01	-2		Li6PS5Br0.75I0.25	Li6PS5X	crystalline	353.357	0.00283	0.16	-0.79588			Impedence spectroscopy	mechanic milling then heating	stainless steel			375	375000000	8.57403		375000000		1015.08	1.01508e-27
Improvement of the ionic conductivity on new substituted borohydride argyrodites	Figure S3	Li6PS5Br0.75I0.25		0.16	-0.79588	0.190476	-0.720159	0.84	-0.0757207	5.25	0.720159	0.01	-2	0.010101	-1.99564	5.05952	0.70411			-0.720159				-0.79588	0.01	-2		Li6PS5Br0.75I0.25	Li6PS5X	crystalline	363.636	0.00275	0.16	-0.79588			Impedence spectroscopy	mechanic milling then heating	stainless steel			375	375000000	8.57403		375000000		1015.08	1.01508e-27
Improvement of the ionic conductivity on new substituted borohydride argyrodites	Figure S3	Li6PS5Br0.25I0.75		0.02	-1.69897	0.0204082	-1.6902	0.98	-0.00877392	49	1.6902	0.01	-2	0.010101	-1.99564	48.9796	1.69002			-1.6902				-1.69897	0.02	-1.69897		Li6PS5Br0.25I0.75	Li6PS5X	crystalline	253.165	0.00395	0.03	-1.52288			Impedence spectroscopy	mechanic milling then heating	stainless steel			375	375000000	8.57403		375000000		1036.43	1.03643e-27
Improvement of the ionic conductivity on new substituted borohydride argyrodites	Figure S3	Li6PS5Br0.25I0.75		0.02	-1.69897	0.0204082	-1.6902	0.98	-0.00877392	49	1.6902	0.01	-2	0.010101	-1.99564	48.9796	1.69002			-1.6902				-1.69897	0.02	-1.69897		Li6PS5Br0.25I0.75	Li6PS5X	crystalline	263.158	0.0038	0.03	-1.52288			Impedence spectroscopy	mechanic milling then heating	stainless steel			375	375000000	8.57403		375000000		1036.43	1.03643e-27
Improvement of the ionic conductivity on new substituted borohydride argyrodites	Figure S3	Li6PS5Br0.25I0.75		0.02	-1.69897	0.0204082	-1.6902	0.98	-0.00877392	49	1.6902	0.01	-2	0.010101	-1.99564	48.9796	1.69002			-1.6902				-1.69897	0.02	-1.69897		Li6PS5Br0.25I0.75	Li6PS5X	crystalline	273.224	0.00366	0.03	-1.52288			Impedence spectroscopy	mechanic milling then heating	stainless steel			375	375000000	8.57403		375000000		1036.43	1.03643e-27
Improvement of the ionic conductivity on new substituted borohydride argyrodites	Figure S3	Li6PS5Br0.25I0.75		0.02	-1.69897	0.0204082	-1.6902	0.98	-0.00877392	49	1.6902	0.01	-2	0.010101	-1.99564	48.9796	1.69002			-1.6902				-1.69897	0.02	-1.69897		Li6PS5Br0.25I0.75	Li6PS5X	crystalline	283.286	0.00353	0.03	-1.52288			Impedence spectroscopy	mechanic milling then heating	stainless steel			375	375000000	8.57403		375000000		1036.43	1.03643e-27
Improvement of the ionic conductivity on new substituted borohydride argyrodites	Figure S3	Li6PS5Br0.25I0.75		0.02	-1.69897	0.0204082	-1.6902	0.98	-0.00877392	49	1.6902	0.01	-2	0.010101	-1.99564	48.9796	1.69002			-1.6902				-1.69897	0.02	-1.69897		Li6PS5Br0.25I0.75	Li6PS5X	crystalline	293.255	0.00341	0.03	-1.52288			Impedence spectroscopy	mechanic milling then heating	stainless steel			375	375000000	8.57403		375000000		1036.43	1.03643e-27
Improvement of the ionic conductivity on new substituted borohydride argyrodites	Figure S3	Li6PS5Br0.25I0.75		0.02	-1.69897	0.0204082	-1.6902	0.98	-0.00877392	49	1.6902	0.01	-2	0.010101	-1.99564	48.9796	1.69002			-1.6902				-1.69897	0.02	-1.69897		Li6PS5Br0.25I0.75	Li6PS5X	crystalline	303.03	0.0033	0.03	-1.52288			Impedence spectroscopy	mechanic milling then heating	stainless steel			375	375000000	8.57403		375000000		1036.43	1.03643e-27
Improvement of the ionic conductivity on new substituted borohydride argyrodites	Figure S3	Li6PS5Br0.25I0.75		0.02	-1.69897	0.0204082	-1.6902	0.98	-0.00877392	49	1.6902	0.01	-2	0.010101	-1.99564	48.9796	1.69002			-1.6902				-1.69897	0.02	-1.69897		Li6PS5Br0.25I0.75	Li6PS5X	crystalline	312.5	0.0032	0.03	-1.52288			Impedence spectroscopy	mechanic milling then heating	stainless steel			375	375000000	8.57403		375000000		1036.43	1.03643e-27
Improvement of the ionic conductivity on new substituted borohydride argyrodites	Figure S3	Li6PS5Br0.25I0.75		0.02	-1.69897	0.0204082	-1.6902	0.98	-0.00877392	49	1.6902	0.01	-2	0.010101	-1.99564	48.9796	1.69002			-1.6902				-1.69897	0.02	-1.69897		Li6PS5Br0.25I0.75	Li6PS5X	crystalline	322.581	0.0031	0.03	-1.52288			Impedence spectroscopy	mechanic milling then heating	stainless steel			375	375000000	8.57403		375000000		1036.43	1.03643e-27
Improvement of the ionic conductivity on new substituted borohydride argyrodites	Figure S3	Li6PS5Br0.25I0.75		0.02	-1.69897	0.0204082	-1.6902	0.98	-0.00877392	49	1.6902	0.01	-2	0.010101	-1.99564	48.9796	1.69002			-1.6902				-1.69897	0.02	-1.69897		Li6PS5Br0.25I0.75	Li6PS5X	crystalline	333.333	0.003	0.03	-1.52288			Impedence spectroscopy	mechanic milling then heating	stainless steel			375	375000000	8.57403		375000000		1036.43	1.03643e-27
Improvement of the ionic conductivity on new substituted borohydride argyrodites	Figure S3	Li6PS5Br0.25I0.75		0.02	-1.69897	0.0204082	-1.6902	0.98	-0.00877392	49	1.6902	0.01	-2	0.010101	-1.99564	48.9796	1.69002			-1.6902				-1.69897	0.02	-1.69897		Li6PS5Br0.25I0.75	Li6PS5X	crystalline	343.643	0.00291	0.03	-1.52288			Impedence spectroscopy	mechanic milling then heating	stainless steel			375	375000000	8.57403		375000000		1036.43	1.03643e-27
Improvement of the ionic conductivity on new substituted borohydride argyrodites	Figure S3	Li6PS5Br0.25I0.75		0.02	-1.69897	0.0204082	-1.6902	0.98	-0.00877392	49	1.6902	0.01	-2	0.010101	-1.99564	48.9796	1.69002			-1.6902				-1.69897	0.02	-1.69897		Li6PS5Br0.25I0.75	Li6PS5X	crystalline	353.357	0.00283	0.03	-1.52288			Impedence spectroscopy	mechanic milling then heating	stainless steel			375	375000000	8.57403		375000000		1036.43	1.03643e-27
Improvement of the ionic conductivity on new substituted borohydride argyrodites	Figure S3	Li6PS5Br0.25I0.75		0.02	-1.69897	0.0204082	-1.6902	0.98	-0.00877392	49	1.6902	0.01	-2	0.010101	-1.99564	48.9796	1.69002			-1.6902				-1.69897	0.02	-1.69897		Li6PS5Br0.25I0.75	Li6PS5X	crystalline	363.636	0.00275	0.03	-1.52288			Impedence spectroscopy	mechanic milling then heating	stainless steel			375	375000000	8.57403		375000000		1036.43	1.03643e-27
Improvement of the ionic conductivity on new substituted borohydride argyrodites	Figure S3	Li6PS5I		0.01	-2	0.010101	-1.99564	0.99	-0.00436481	99	1.99564	0.01	-2	0.010101	-1.99564	98.9899	1.99559			-1.99564				-2	0.02	-1.69897		Li6PS5I	Li6PS5X	crystalline	253.165	0.00395	0.02	-1.69897			Impedence spectroscopy	mechanic milling then heating	stainless steel			375	375000000	8.57403		375000000		1042.59	1.04259e-27
Improvement of the ionic conductivity on new substituted borohydride argyrodites	Figure S3	Li6PS5I		0.01	-2	0.010101	-1.99564	0.99	-0.00436481	99	1.99564	0.01	-2	0.010101	-1.99564	98.9899	1.99559			-1.99564				-2	0.02	-1.69897		Li6PS5I	Li6PS5X	crystalline	263.158	0.0038	0.02	-1.69897			Impedence spectroscopy	mechanic milling then heating	stainless steel			375	375000000	8.57403		375000000		1042.59	1.04259e-27
Improvement of the ionic conductivity on new substituted borohydride argyrodites	Figure S3	Li6PS5I		0.01	-2	0.010101	-1.99564	0.99	-0.00436481	99	1.99564	0.01	-2	0.010101	-1.99564	98.9899	1.99559			-1.99564				-2	0.02	-1.69897		Li6PS5I	Li6PS5X	crystalline	273.224	0.00366	0.02	-1.69897			Impedence spectroscopy	mechanic milling then heating	stainless steel			375	375000000	8.57403		375000000		1042.59	1.04259e-27
Improvement of the ionic conductivity on new substituted borohydride argyrodites	Figure S3	Li6PS5I		0.01	-2	0.010101	-1.99564	0.99	-0.00436481	99	1.99564	0.01	-2	0.010101	-1.99564	98.9899	1.99559			-1.99564				-2	0.02	-1.69897		Li6PS5I	Li6PS5X	crystalline	283.286	0.00353	0.02	-1.69897			Impedence spectroscopy	mechanic milling then heating	stainless steel			375	375000000	8.57403		375000000		1042.59	1.04259e-27
Improvement of the ionic conductivity on new substituted borohydride argyrodites	Figure S3	Li6PS5I		0.01	-2	0.010101	-1.99564	0.99	-0.00436481	99	1.99564	0.01	-2	0.010101	-1.99564	98.9899	1.99559			-1.99564				-2	0.02	-1.69897		Li6PS5I	Li6PS5X	crystalline	293.255	0.00341	0.02	-1.69897			Impedence spectroscopy	mechanic milling then heating	stainless steel			375	375000000	8.57403		375000000		1042.59	1.04259e-27
Improvement of the ionic conductivity on new substituted borohydride argyrodites	Figure S3	Li6PS5I		0.01	-2	0.010101	-1.99564	0.99	-0.00436481	99	1.99564	0.01	-2	0.010101	-1.99564	98.9899	1.99559			-1.99564				-2	0.02	-1.69897		Li6PS5I	Li6PS5X	crystalline	303.03	0.0033	0.02	-1.69897			Impedence spectroscopy	mechanic milling then heating	stainless steel			375	375000000	8.57403		375000000		1042.59	1.04259e-27
Improvement of the ionic conductivity on new substituted borohydride argyrodites	Figure S3	Li6PS5I		0.01	-2	0.010101	-1.99564	0.99	-0.00436481	99	1.99564	0.01	-2	0.010101	-1.99564	98.9899	1.99559			-1.99564				-2	0.02	-1.69897		Li6PS5I	Li6PS5X	crystalline	312.5	0.0032	0.02	-1.69897			Impedence spectroscopy	mechanic milling then heating	stainless steel			375	375000000	8.57403		375000000		1042.59	1.04259e-27
Improvement of the ionic conductivity on new substituted borohydride argyrodites	Figure S3	Li6PS5I		0.01	-2	0.010101	-1.99564	0.99	-0.00436481	99	1.99564	0.01	-2	0.010101	-1.99564	98.9899	1.99559			-1.99564				-2	0.02	-1.69897		Li6PS5I	Li6PS5X	crystalline	322.581	0.0031	0.02	-1.69897			Impedence spectroscopy	mechanic milling then heating	stainless steel			375	375000000	8.57403		375000000		1042.59	1.04259e-27
Improvement of the ionic conductivity on new substituted borohydride argyrodites	Figure S3	Li6PS5I		0.01	-2	0.010101	-1.99564	0.99	-0.00436481	99	1.99564	0.01	-2	0.010101	-1.99564	98.9899	1.99559			-1.99564				-2	0.02	-1.69897		Li6PS5I	Li6PS5X	crystalline	333.333	0.003	0.02	-1.69897			Impedence spectroscopy	mechanic milling then heating	stainless steel			375	375000000	8.57403		375000000		1042.59	1.04259e-27
Improvement of the ionic conductivity on new substituted borohydride argyrodites	Figure S3	Li6PS5I		0.01	-2	0.010101	-1.99564	0.99	-0.00436481	99	1.99564	0.01	-2	0.010101	-1.99564	98.9899	1.99559			-1.99564				-2	0.02	-1.69897		Li6PS5I	Li6PS5X	crystalline	343.643	0.00291	0.02	-1.69897			Impedence spectroscopy	mechanic milling then heating	stainless steel			375	375000000	8.57403		375000000		1042.59	1.04259e-27
Improvement of the ionic conductivity on new substituted borohydride argyrodites	Figure S3	Li6PS5I		0.01	-2	0.010101	-1.99564	0.99	-0.00436481	99	1.99564	0.01	-2	0.010101	-1.99564	98.9899	1.99559			-1.99564				-2	0.02	-1.69897		Li6PS5I	Li6PS5X	crystalline	353.357	0.00283	0.02	-1.69897			Impedence spectroscopy	mechanic milling then heating	stainless steel			375	375000000	8.57403		375000000		1042.59	1.04259e-27
Improvement of the ionic conductivity on new substituted borohydride argyrodites	Figure S3	Li6PS5I		0.01	-2	0.010101	-1.99564	0.99	-0.00436481	99	1.99564	0.01	-2	0.010101	-1.99564	98.9899	1.99559			-1.99564				-2	0.02	-1.69897		Li6PS5I	Li6PS5X	crystalline	363.636	0.00275	0.02	-1.69897			Impedence spectroscopy	mechanic milling then heating	stainless steel			375	375000000	8.57403		375000000		1042.59	1.04259e-27
Improvement of the ionic conductivity on new substituted borohydride argyrodites	Figure S4	Li6PS5Cl		0.62	-0.207608	1.63158	0.212608	0.38	-0.420216	0.612903	-0.212608	0.01	-2	0.010101	-1.99564	1.01868	0.00803596			0.212608				-0.207608	0.01	-2		Li6PS5Cl	Li6PS5X	crystalline	263.158	0.0038	0.62	-0.207608			Impedence spectroscopy	mechanic milling then heating	titanium	75000000	7.87506	370	370000000	8.5682		370000000		958.585	9.58585e-28
Improvement of the ionic conductivity on new substituted borohydride argyrodites	Figure S4	Li6PS5Cl		0.62	-0.207608	1.63158	0.212608	0.38	-0.420216	0.612903	-0.212608	0.01	-2	0.010101	-1.99564	1.01868	0.00803596			0.212608				-0.207608	0.01	-2		Li6PS5Cl	Li6PS5X	crystalline	272.109	0.003675	0.62	-0.207608			Impedence spectroscopy	mechanic milling then heating	titanium	75000000	7.87506	370	370000000	8.5682		370000000		958.585	9.58585e-28
Improvement of the ionic conductivity on new substituted borohydride argyrodites	Figure S4	Li6PS5Cl		0.62	-0.207608	1.63158	0.212608	0.38	-0.420216	0.612903	-0.212608	0.01	-2	0.010101	-1.99564	1.01868	0.00803596			0.212608				-0.207608	0.01	-2		Li6PS5Cl	Li6PS5X	crystalline	283.286	0.00353	0.62	-0.207608			Impedence spectroscopy	mechanic milling then heating	titanium	75000000	7.87506	370	370000000	8.5682		370000000		958.585	9.58585e-28
Improvement of the ionic conductivity on new substituted borohydride argyrodites	Figure S4	Li6PS5Cl		0.62	-0.207608	1.63158	0.212608	0.38	-0.420216	0.612903	-0.212608	0.01	-2	0.010101	-1.99564	1.01868	0.00803596			0.212608				-0.207608	0.01	-2		Li6PS5Cl	Li6PS5X	crystalline	297.619	0.00336	0.62	-0.207608			Impedence spectroscopy	mechanic milling then heating	titanium	75000000	7.87506	370	370000000	8.5682		370000000		958.585	9.58585e-28
Improvement of the ionic conductivity on new substituted borohydride argyrodites	Figure S4	Li6PS5Cl		0.62	-0.207608	1.63158	0.212608	0.38	-0.420216	0.612903	-0.212608	0.01	-2	0.010101	-1.99564	1.01868	0.00803596			0.212608				-0.207608	0.01	-2		Li6PS5Cl	Li6PS5X	crystalline	303.03	0.0033	0.62	-0.207608			Impedence spectroscopy	mechanic milling then heating	titanium	75000000	7.87506	370	370000000	8.5682		370000000		958.585	9.58585e-28
Improvement of the ionic conductivity on new substituted borohydride argyrodites	Figure S4	Li6PS5Cl		0.62	-0.207608	1.63158	0.212608	0.38	-0.420216	0.612903	-0.212608	0.01	-2	0.010101	-1.99564	1.01868	0.00803596			0.212608				-0.207608	0.01	-2		Li6PS5Cl	Li6PS5X	crystalline	312.5	0.0032	0.62	-0.207608			Impedence spectroscopy	mechanic milling then heating	titanium	75000000	7.87506	370	370000000	8.5682		370000000		958.585	9.58585e-28
Improvement of the ionic conductivity on new substituted borohydride argyrodites	Figure S4	Li6PS5Cl		0.62	-0.207608	1.63158	0.212608	0.38	-0.420216	0.612903	-0.212608	0.01	-2	0.010101	-1.99564	1.01868	0.00803596			0.212608				-0.207608	0.01	-2		Li6PS5Cl	Li6PS5X	crystalline	322.581	0.0031	0.62	-0.207608			Impedence spectroscopy	mechanic milling then heating	titanium	75000000	7.87506	370	370000000	8.5682		370000000		958.585	9.58585e-28
Improvement of the ionic conductivity on new substituted borohydride argyrodites	Figure S4	Li6PS5Cl		0.62	-0.207608	1.63158	0.212608	0.38	-0.420216	0.612903	-0.212608	0.01	-2	0.010101	-1.99564	1.01868	0.00803596			0.212608				-0.207608	0.01	-2		Li6PS5Cl	Li6PS5X	crystalline	333.333	0.003	0.62	-0.207608			Impedence spectroscopy	mechanic milling then heating	titanium	75000000	7.87506	370	370000000	8.5682		370000000		958.585	9.58585e-28
Improvement of the ionic conductivity on new substituted borohydride argyrodites	Figure S4	Li6PS5Br0.75I0.25		0.16	-0.79588	0.190476	-0.720159	0.84	-0.0757207	5.25	0.720159	0.01	-2	0.010101	-1.99564	5.05952	0.70411			-0.720159				-0.79588	0.01	-2		Li6PS5Br0.75I0.25	Li6PS5X	crystalline	263.158	0.0038	0.16	-0.79588			Impedence spectroscopy	mechanic milling then heating	titanium	75000000	7.87506	370	370000000	8.5682		370000000		1015.08	1.01508e-27
Improvement of the ionic conductivity on new substituted borohydride argyrodites	Figure S4	Li6PS5Br0.75I0.25		0.16	-0.79588	0.190476	-0.720159	0.84	-0.0757207	5.25	0.720159	0.01	-2	0.010101	-1.99564	5.05952	0.70411			-0.720159				-0.79588	0.01	-2		Li6PS5Br0.75I0.25	Li6PS5X	crystalline	272.109	0.003675	0.16	-0.79588			Impedence spectroscopy	mechanic milling then heating	titanium	75000000	7.87506	370	370000000	8.5682		370000000		1015.08	1.01508e-27
Improvement of the ionic conductivity on new substituted borohydride argyrodites	Figure S4	Li6PS5Br0.75I0.25		0.16	-0.79588	0.190476	-0.720159	0.84	-0.0757207	5.25	0.720159	0.01	-2	0.010101	-1.99564	5.05952	0.70411			-0.720159				-0.79588	0.01	-2		Li6PS5Br0.75I0.25	Li6PS5X	crystalline	283.286	0.00353	0.16	-0.79588			Impedence spectroscopy	mechanic milling then heating	titanium	75000000	7.87506	370	370000000	8.5682		370000000		1015.08	1.01508e-27
Improvement of the ionic conductivity on new substituted borohydride argyrodites	Figure S4	Li6PS5Br0.75I0.25		0.16	-0.79588	0.190476	-0.720159	0.84	-0.0757207	5.25	0.720159	0.01	-2	0.010101	-1.99564	5.05952	0.70411			-0.720159				-0.79588	0.01	-2		Li6PS5Br0.75I0.25	Li6PS5X	crystalline	297.619	0.00336	0.16	-0.79588			Impedence spectroscopy	mechanic milling then heating	titanium	75000000	7.87506	370	370000000	8.5682		370000000		1015.08	1.01508e-27
Improvement of the ionic conductivity on new substituted borohydride argyrodites	Figure S4	Li6PS5Br0.75I0.25		0.16	-0.79588	0.190476	-0.720159	0.84	-0.0757207	5.25	0.720159	0.01	-2	0.010101	-1.99564	5.05952	0.70411			-0.720159				-0.79588	0.01	-2		Li6PS5Br0.75I0.25	Li6PS5X	crystalline	303.03	0.0033	0.16	-0.79588			Impedence spectroscopy	mechanic milling then heating	titanium	75000000	7.87506	370	370000000	8.5682		370000000		1015.08	1.01508e-27
Improvement of the ionic conductivity on new substituted borohydride argyrodites	Figure 3b	Li6PS5Cl	Li6PS5X	0.62	-0.207608	1.63158	0.212608	0.38	-0.420216	0.612903	-0.212608	0.01	-2	0.010101	-1.99564	1.01868	0.00803596			0.212608				-0.207608	0.01	-2		Li6PS5Cl	Li6PS5X	crystalline	383.142	0.00261	0.62	-0.207608			Impedence spectroscopy	mechanic milling then heating	Indium foil	100000	5	588	588000000	8.76938		400000000		949.57	9.4957e-28
Improvement of the ionic conductivity on new substituted borohydride argyrodites	Figure 3b	Li6PS5Cl	Li6PS5X	0.62	-0.207608	1.63158	0.212608	0.38	-0.420216	0.612903	-0.212608	0.01	-2	0.010101	-1.99564	1.01868	0.00803596			0.212608				-0.207608	0.01	-2		Li6PS5Cl	Li6PS5X	crystalline	393.701	0.00254	0.62	-0.207608			Impedence spectroscopy	mechanic milling then heating	Indium foil	100000	5	588	588000000	8.76938		400000000		949.57	9.4957e-28
Improvement of the ionic conductivity on new substituted borohydride argyrodites	Figure 3b	Li6PS5Cl	Li6PS5X	0.62	-0.207608	1.63158	0.212608	0.38	-0.420216	0.612903	-0.212608	0.01	-2	0.010101	-1.99564	1.01868	0.00803596			0.212608				-0.207608	0.01	-2		Li6PS5Cl	Li6PS5X	crystalline	403.226	0.00248	0.62	-0.207608			Impedence spectroscopy	mechanic milling then heating	Indium foil	100000	5	588	588000000	8.76938		400000000		949.57	9.4957e-28
Improvement of the ionic conductivity on new substituted borohydride argyrodites	Figure 3b	Li6PS5Cl	Li6PS5X	0.62	-0.207608	1.63158	0.212608	0.38	-0.420216	0.612903	-0.212608	0.01	-2	0.010101	-1.99564	1.01868	0.00803596			0.212608				-0.207608	0.01	-2		Li6PS5Cl	Li6PS5X	crystalline	413.223	0.00242	0.62	-0.207608			Impedence spectroscopy	mechanic milling then heating	Indium foil	100000	5	588	588000000	8.76938		400000000		949.57	9.4957e-28
Improvement of the ionic conductivity on new substituted borohydride argyrodites	Figure 3b	Li6PS5Cl	Li6PS5X	0.62	-0.207608	1.63158	0.212608	0.38	-0.420216	0.612903	-0.212608	0.01	-2	0.010101	-1.99564	1.01868	0.00803596			0.212608				-0.207608	0.01	-2		Li6PS5Cl	Li6PS5X	crystalline	421.941	0.00237	0.62	-0.207608			Impedence spectroscopy	mechanic milling then heating	Indium foil	100000	5	588	588000000	8.76938		400000000		949.57	9.4957e-28
Improvement of the ionic conductivity on new substituted borohydride argyrodites	Figure 3b	Li6PS5Cl0.5Br0.5	Li6PS5X	0.5	-0.30103	1	0	0.5	-0.30103	1	0	0.01	-2	0.010101	-1.99564	0.01	-2			0				-0.30103	-0.04	#NUM!		Li6PS5Cl0.5Br0.5	Li6PS5X	crystalline	304.878	0.00328	0.45	-0.346787			Impedence spectroscopy	mechanic milling then heating	Indium foil	100000	5	588	588000000	8.76938		400000000		972.15	9.7215e-28
Improvement of the ionic conductivity on new substituted borohydride argyrodites	Figure 3b	Li6PS5Cl0.5Br0.5	Li6PS5X	0.5	-0.30103	1	0	0.5	-0.30103	1	0	0.01	-2	0.010101	-1.99564	0.01	-2			0				-0.30103	-0.04	#NUM!		Li6PS5Cl0.5Br0.5	Li6PS5X	crystalline	314.465	0.00318	0.45	-0.346787			Impedence spectroscopy	mechanic milling then heating	Indium foil	100000	5	588	588000000	8.76938		400000000		972.15	9.7215e-28
Improvement of the ionic conductivity on new substituted borohydride argyrodites	Figure 3b	Li6PS5Cl0.5Br0.5	Li6PS5X	0.5	-0.30103	1	0	0.5	-0.30103	1	0	0.01	-2	0.010101	-1.99564	0.01	-2			0				-0.30103	-0.04	#NUM!		Li6PS5Cl0.5Br0.5	Li6PS5X	crystalline	323.625	0.00309	0.45	-0.346787			Impedence spectroscopy	mechanic milling then heating	Indium foil	100000	5	588	588000000	8.76938		400000000		972.15	9.7215e-28
Improvement of the ionic conductivity on new substituted borohydride argyrodites	Figure 3b	Li6PS5Cl0.5Br0.5	Li6PS5X	0.5	-0.30103	1	0	0.5	-0.30103	1	0	0.01	-2	0.010101	-1.99564	0.01	-2			0				-0.30103	-0.04	#NUM!		Li6PS5Cl0.5Br0.5	Li6PS5X	crystalline	334.448	0.00299	0.45	-0.346787			Impedence spectroscopy	mechanic milling then heating	Indium foil	100000	5	588	588000000	8.76938		400000000		972.15	9.7215e-28
Improvement of the ionic conductivity on new substituted borohydride argyrodites	Figure 3b	Li6PS5Cl0.5Br0.5	Li6PS5X	0.5	-0.30103	1	0	0.5	-0.30103	1	0	0.01	-2	0.010101	-1.99564	0.01	-2			0				-0.30103	-0.04	#NUM!		Li6PS5Cl0.5Br0.5	Li6PS5X	crystalline	344.828	0.0029	0.45	-0.346787			Impedence spectroscopy	mechanic milling then heating	Indium foil	100000	5	588	588000000	8.76938		400000000		972.15	9.7215e-28
Improvement of the ionic conductivity on new substituted borohydride argyrodites	Figure 3b	Li6PS5Cl0.5Br0.5	Li6PS5X	0.5	-0.30103	1	0	0.5	-0.30103	1	0	0.01	-2	0.010101	-1.99564	0.01	-2			0				-0.30103	-0.04	#NUM!		Li6PS5Cl0.5Br0.5	Li6PS5X	crystalline	354.61	0.00282	0.45	-0.346787			Impedence spectroscopy	mechanic milling then heating	Indium foil	100000	5	588	588000000	8.76938		400000000		972.15	9.7215e-28
Improvement of the ionic conductivity on new substituted borohydride argyrodites	Figure 3b	Li6PS5Cl0.5Br0.5	Li6PS5X	0.5	-0.30103	1	0	0.5	-0.30103	1	0	0.01	-2	0.010101	-1.99564	0.01	-2			0				-0.30103	-0.04	#NUM!		Li6PS5Cl0.5Br0.5	Li6PS5X	crystalline	363.636	0.00275	0.45	-0.346787			Impedence spectroscopy	mechanic milling then heating	Indium foil	100000	5	588	588000000	8.76938		400000000		972.15	9.7215e-28
Improvement of the ionic conductivity on new substituted borohydride argyrodites	Figure 3b	Li6PS5Cl0.5Br0.5	Li6PS5X	0.5	-0.30103	1	0	0.5	-0.30103	1	0	0.01	-2	0.010101	-1.99564	0.01	-2			0				-0.30103	-0.04	#NUM!		Li6PS5Cl0.5Br0.5	Li6PS5X	crystalline	373.134	0.00268	0.45	-0.346787			Impedence spectroscopy	mechanic milling then heating	Indium foil	100000	5	588	588000000	8.76938		400000000		972.15	9.7215e-28
Improvement of the ionic conductivity on new substituted borohydride argyrodites	Figure 3b	Li6PS5Cl0.5Br0.5	Li6PS5X	0.5	-0.30103	1	0	0.5	-0.30103	1	0	0.01	-2	0.010101	-1.99564	0.01	-2			0				-0.30103	-0.04	#NUM!		Li6PS5Cl0.5Br0.5	Li6PS5X	crystalline	384.615	0.0026	0.45	-0.346787			Impedence spectroscopy	mechanic milling then heating	Indium foil	100000	5	588	588000000	8.76938		400000000		972.15	9.7215e-28
Improvement of the ionic conductivity on new substituted borohydride argyrodites	Figure 3b	Li6PS5Cl0.5Br0.5	Li6PS5X	0.5	-0.30103	1	0	0.5	-0.30103	1	0	0.01	-2	0.010101	-1.99564	0.01	-2			0				-0.30103	-0.04	#NUM!		Li6PS5Cl0.5Br0.5	Li6PS5X	crystalline	395.257	0.00253	0.45	-0.346787			Impedence spectroscopy	mechanic milling then heating	Indium foil	100000	5	588	588000000	8.76938		400000000		972.15	9.7215e-28
Improvement of the ionic conductivity on new substituted borohydride argyrodites	Figure 3b	Li6PS5Cl0.5Br0.5	Li6PS5X	0.5	-0.30103	1	0	0.5	-0.30103	1	0	0.01	-2	0.010101	-1.99564	0.01	-2			0				-0.30103	-0.04	#NUM!		Li6PS5Cl0.5Br0.5	Li6PS5X	crystalline	404.858	0.00247	0.45	-0.346787			Impedence spectroscopy	mechanic milling then heating	Indium foil	100000	5	588	588000000	8.76938		400000000		972.15	9.7215e-28
Improvement of the ionic conductivity on new substituted borohydride argyrodites	Figure 3b	Li6PS5Cl0.5Br0.5	Li6PS5X	0.5	-0.30103	1	0	0.5	-0.30103	1	0	0.01	-2	0.010101	-1.99564	0.01	-2			0				-0.30103	-0.04	#NUM!		Li6PS5Cl0.5Br0.5	Li6PS5X	crystalline	414.938	0.00241	0.45	-0.346787			Impedence spectroscopy	mechanic milling then heating	Indium foil	100000	5	588	588000000	8.76938		400000000		972.15	9.7215e-28
Improvement of the ionic conductivity on new substituted borohydride argyrodites	Figure 3b	Li6PS5Cl0.5Br0.5	Li6PS5X	0.5	-0.30103	1	0	0.5	-0.30103	1	0	0.01	-2	0.010101	-1.99564	0.01	-2			0				-0.30103	-0.04	#NUM!		Li6PS5Cl0.5Br0.5	Li6PS5X	crystalline	423.729	0.00236	0.45	-0.346787			Impedence spectroscopy	mechanic milling then heating	Indium foil	100000	5	588	588000000	8.76938		400000000		972.15	9.7215e-28
Improvement of the ionic conductivity on new substituted borohydride argyrodites	Table 1	Li6PS5I	Li6PS5X	0.01	-2	0.010101	-1.99564	0.99	-0.00436481	99	1.99564	0.01	-2	0.010101	-1.99564	98.9899	1.99559			-1.99564				-2	0.02	-1.69897		Li6PS5I		crystalline	293.15	0.00236	0.02	-1.69897			Impedence spectroscopy	mechanic milling then heating	stainless steel	1000000	6	980	980000000	8.99123				1042.59	1.04259e-27
Improvement of the ionic conductivity on new substituted borohydride argyrodites	Table 1	Li6PS5I	Li6PS5X	0.01	-2	0.010101	-1.99564	0.99	-0.00436481	99	1.99564	0.01	-2	0.010101	-1.99564	98.9899	1.99559			-1.99564				-2	0.02	-1.69897		Li6PS5I		crystalline	293.15	0.00236	0.02				Impedence spectroscopy	mechanic milling then heating	stainless steel	1000000	6	980	980000000	8.99123				1042.59	1.04259e-27
Improvement of the ionic conductivity on new substituted borohydride argyrodites	Table 1	Li6PS5Cl	Li6PS5X	0.62	-0.207608	1.63158	0.212608	0.38	-0.420216	0.612903	-0.212608	0.01	-2	0.010101	-1.99564	1.01868	0.00803596			0.212608				-0.207608	-0.59	#NUM!		Li6PS5Cl		crystalline	293.15	0.00236	0.02				Impedence spectroscopy	mechanic milling then heating	stainless steel	1000000	6	980	980000000	8.99123				949.862	9.49862e-28
Improvement of the ionic conductivity on new substituted borohydride argyrodites	Table 1	Li6PS5Cl	Li6PS5X	0.62	-0.207608	1.63158	0.212608	0.38	-0.420216	0.612903	-0.212608	0.01	-2	0.010101	-1.99564	1.01868	0.00803596			0.212608				-0.207608	-0.59	#NUM!		Li6PS5Cl		crystalline	293.15	0.00236	0.02				Impedence spectroscopy	mechanic milling then heating	stainless steel	1000000	6	980	980000000	8.99123				949.862	9.49862e-28
Inducing High Ionic Conductivity in the Lithium SuperionicArgyrodites Li6+xP1−xGexS5 I for All-Solid-State Batteries	Figure 5b	Li6+0P1-0Ge0S5I	Li6+xP1-xGexS5I	0.01	-2	0.010101	-1.99564	0.99	-0.00436481	99	1.99564	0.01	-2	0.010101	-1.99564	98.9899	1.99559			-1.99564				-2	0.02	-1.69897		Li6+0P1-0Ge0S5I		crystalline	253.15	0.00395023	0.02	-1.69897			Impedence spectroscopy	mechanic milling then heating										1042.59	1.04259e-27
Inducing High Ionic Conductivity in the Lithium SuperionicArgyrodites Li6+xP1−xGexS5 I for All-Solid-State Batteries	Figure 5b	Li6+0P1-0Ge0S5I	Li6+xP1-xGexS5I	0.01	-2	0.010101	-1.99564	0.99	-0.00436481	99	1.99564	0.01	-2	0.010101	-1.99564	98.9899	1.99559			-1.99564				-2	0.02	-1.69897		Li6+0P1-0Ge0S5I		crystalline	263.15	0.00380011	0.02	-1.69897			Impedence spectroscopy	mechanic milling then heating										1042.59	1.04259e-27
Inducing High Ionic Conductivity in the Lithium SuperionicArgyrodites Li6+xP1−xGexS5 I for All-Solid-State Batteries	Figure 5b	Li6+0P1-0Ge0S5I	Li6+xP1-xGexS5I	0.01	-2	0.010101	-1.99564	0.99	-0.00436481	99	1.99564	0.01	-2	0.010101	-1.99564	98.9899	1.99559			-1.99564				-2	0.02	-1.69897		Li6+0P1-0Ge0S5I		crystalline	273.15	0.00366099	0.02	-1.69897			Impedence spectroscopy	mechanic milling then heating										1042.59	1.04259e-27
Inducing High Ionic Conductivity in the Lithium SuperionicArgyrodites Li6+xP1−xGexS5 I for All-Solid-State Batteries	Figure 5b	Li6+0P1-0Ge0S5I	Li6+xP1-xGexS5I	0.01	-2	0.010101	-1.99564	0.99	-0.00436481	99	1.99564	0.01	-2	0.010101	-1.99564	98.9899	1.99559			-1.99564				-2	0.02	-1.69897		Li6+0P1-0Ge0S5I		crystalline	283.15	0.0035317	0.02	-1.69897			Impedence spectroscopy	mechanic milling then heating										1042.59	1.04259e-27
Inducing High Ionic Conductivity in the Lithium SuperionicArgyrodites Li6+xP1−xGexS5 I for All-Solid-State Batteries	Figure 5b	Li6+0P1-0Ge0S5I	Li6+xP1-xGexS5I	0.01	-2	0.010101	-1.99564	0.99	-0.00436481	99	1.99564	0.01	-2	0.010101	-1.99564	98.9899	1.99559			-1.99564				-2	0.02	-1.69897		Li6+0P1-0Ge0S5I		crystalline	293.15	0.00341122	0.02	-1.69897			Impedence spectroscopy	mechanic milling then heating										1042.59	1.04259e-27
Inducing High Ionic Conductivity in the Lithium SuperionicArgyrodites Li6+xP1−xGexS5 I for All-Solid-State Batteries	Figure 5b	Li6+0P1-0Ge0S5I	Li6+xP1-xGexS5I	0.01	-2	0.010101	-1.99564	0.99	-0.00436481	99	1.99564	0.01	-2	0.010101	-1.99564	98.9899	1.99559			-1.99564				-2	0.02	-1.69897		Li6+0P1-0Ge0S5I		crystalline	303.15	0.0032987	0.02	-1.69897			Impedence spectroscopy	mechanic milling then heating										1042.59	1.04259e-27
Inducing High Ionic Conductivity in the Lithium SuperionicArgyrodites Li6+xP1−xGexS5 I for All-Solid-State Batteries	Figure 5b	Li6+0P1-0Ge0S5I	Li6+xP1-xGexS5I	0.01	-2	0.010101	-1.99564	0.99	-0.00436481	99	1.99564	0.01	-2	0.010101	-1.99564	98.9899	1.99559			-1.99564				-2	0.02	-1.69897		Li6+0P1-0Ge0S5I		crystalline	313.15	0.00319336	0.02	-1.69897			Impedence spectroscopy	mechanic milling then heating										1042.59	1.04259e-27
Inducing High Ionic Conductivity in the Lithium SuperionicArgyrodites Li6+xP1−xGexS5 I for All-Solid-State Batteries	Figure 5b	Li6+0P1-0Ge0S5I	Li6+xP1-xGexS5I	0.01	-2	0.010101	-1.99564	0.99	-0.00436481	99	1.99564	0.01	-2	0.010101	-1.99564	98.9899	1.99559			-1.99564				-2	0.02	-1.69897		Li6+0P1-0Ge0S5I		crystalline	323.15	0.00309454	0.02	-1.69897			Impedence spectroscopy	mechanic milling then heating										1042.59	1.04259e-27
Fast ion conduction and its origin in Li6-xPS5-xBr1+x	Fig 2c	Li6PS5Br1	Li6-xPS5-xBr1+x	0.272727	-0.564271	0.375	-0.425969	0.727273	-0.138303	2.66667	0.425969	0.01	-2	0.010101	-1.99564	2.29167	0.360151			-0.425969				-0.564271	0.106273	-0.973578					294.118	0.0034	0.369	-0.432974			Impedence spectroscopy	mechanic milling then heating										988.048	9.88048e-28
Fast ion conduction and its origin in Li6-xPS5-xBr1+x	Fig 2c	Li6PS5Br1	Li6-xPS5-xBr1+x	0.272727	-0.564271	0.375	-0.425969	0.727273	-0.138303	2.66667	0.425969	0.01	-2	0.010101	-1.99564	2.29167	0.360151			-0.425969				-0.564271	0.106273	-0.973578					312.5	0.0032	0.369	-0.432974			Impedence spectroscopy	mechanic milling then heating										988.048	9.88048e-28
Fast ion conduction and its origin in Li6-xPS5-xBr1+x	Fig 2c	Li6PS5Br1	Li6-xPS5-xBr1+x	0.272727	-0.564271	0.375	-0.425969	0.727273	-0.138303	2.66667	0.425969	0.01	-2	0.010101	-1.99564	2.29167	0.360151			-0.425969				-0.564271	0.106273	-0.973578					333.333	0.003	0.369	-0.432974			Impedence spectroscopy	mechanic milling then heating										988.048	9.88048e-28
Fast ion conduction and its origin in Li6-xPS5-xBr1+x	Fig 2c	Li6PS5Br1	Li6-xPS5-xBr1+x	0.272727	-0.564271	0.375	-0.425969	0.727273	-0.138303	2.66667	0.425969	0.01	-2	0.010101	-1.99564	2.29167	0.360151			-0.425969				-0.564271	0.106273	-0.973578					354.61	0.00282	0.369	-0.432974			Impedence spectroscopy	mechanic milling then heating										988.048	9.88048e-28
Fast ion conduction and its origin in Li6-xPS5-xBr1+x	Fig 2c	Li6PS5Br1	Li6-xPS5-xBr1+x	0.272727	-0.564271	0.375	-0.425969	0.727273	-0.138303	2.66667	0.425969	0.01	-2	0.010101	-1.99564	2.29167	0.360151			-0.425969				-0.564271	0.106273	-0.973578					374.532	0.00267	0.369	-0.432974			Impedence spectroscopy	mechanic milling then heating										988.048	9.88048e-28
Fast ion conduction and its origin in Li6-xPS5-xBr1+x	Fig 2c	Li6PS5Br1	Li6-xPS5-xBr1+x	0.272727	-0.564271	0.375	-0.425969	0.727273	-0.138303	2.66667	0.425969	0.01	-2	0.010101	-1.99564	2.29167	0.360151			-0.425969				-0.564271	0.106273	-0.973578					395.257	0.00253	0.369	-0.432974			Impedence spectroscopy	mechanic milling then heating										988.048	9.88048e-28
Fast ion conduction and its origin in Li6-xPS5-xBr1+x	Fig 2c	Li6-0.3PS5-0.3Br1+0.3	Li6-xPS5-xBr1+x	0.272727	-0.564271	0.375	-0.425969	0.875	-0.0579919	7	0.845098	0.01	-2	0.010101	-1.99564	6.625	0.821186			-0.425969				-0.564271	0.136273	-0.865591					294.118	0.0034	0.399	-0.399027			Impedence spectroscopy	mechanic milling then heating										992.519	9.92519e-28
Fast ion conduction and its origin in Li6-xPS5-xBr1+x	Fig 2c	Li6-0.3PS5-0.3Br1+0.3	Li6-xPS5-xBr1+x	0.272727	-0.564271	0.375	-0.425969	0.875	-0.0579919	7	0.845098	0.01	-2	0.010101	-1.99564	6.625	0.821186			-0.425969				-0.564271	0.136273	-0.865591					312.5	0.0032	0.399	-0.399027			Impedence spectroscopy	mechanic milling then heating										992.519	9.92519e-28
Fast ion conduction and its origin in Li6-xPS5-xBr1+x	Fig 2c	Li6-0.3PS5-0.3Br1+0.3	Li6-xPS5-xBr1+x	0.272727	-0.564271	0.375	-0.425969	0.875	-0.0579919	7	0.845098	0.01	-2	0.010101	-1.99564	6.625	0.821186			-0.425969				-0.564271	0.136273	-0.865591					333.333	0.003	0.399	-0.399027			Impedence spectroscopy	mechanic milling then heating										992.519	9.92519e-28
Fast ion conduction and its origin in Li6-xPS5-xBr1+x	Fig 2c	Li6-0.3PS5-0.3Br1+0.3	Li6-xPS5-xBr1+x	0.272727	-0.564271	0.375	-0.425969	0.875	-0.0579919	7	0.845098	0.01	-2	0.010101	-1.99564	6.625	0.821186			-0.425969				-0.564271	0.136273	-0.865591					354.61	0.00282	0.399	-0.399027			Impedence spectroscopy	mechanic milling then heating										992.519	9.92519e-28
Fast ion conduction and its origin in Li6-xPS5-xBr1+x	Fig 2c	Li6-0.3PS5-0.3Br1+0.3	Li6-xPS5-xBr1+x	0.272727	-0.564271	0.375	-0.425969	0.875	-0.0579919	7	0.845098	0.01	-2	0.010101	-1.99564	6.625	0.821186			-0.425969				-0.564271	0.136273	-0.865591					374.532	0.00267	0.399	-0.399027			Impedence spectroscopy	mechanic milling then heating										992.519	9.92519e-28
Fast ion conduction and its origin in Li6-xPS5-xBr1+x	Fig 2c	Li6-0.3PS5-0.3Br1+0.3	Li6-xPS5-xBr1+x	0.272727	-0.564271	0.375	-0.425969	0.875	-0.0579919	7	0.845098	0.01	-2	0.010101	-1.99564	6.625	0.821186			-0.425969				-0.564271	0.136273	-0.865591					395.257	0.00253	0.399	-0.399027			Impedence spectroscopy	mechanic milling then heating										992.519	9.92519e-28
Fast ion conduction and its origin in Li6-xPS5-xBr1+x	Fig 2c	Li6-0.5PS5-0.5Br1+0.5	Li6-xPS5-xBr1+x	0.5	-0.30103	1	0	0.99	-0.00436481	99	1.99564	0.01	-2	0.010101	-1.99564	98	1.99123			0				-0.30103	0.095	-1.02228					294.118	0.0034	0.585	-0.232844			Impedence spectroscopy	mechanic milling then heating										995.507	9.95507e-28
Fast ion conduction and its origin in Li6-xPS5-xBr1+x	Fig 2c	Li6-0.5PS5-0.5Br1+0.5	Li6-xPS5-xBr1+x	0.5	-0.30103	1	0	0.99	-0.00436481	99	1.99564	0.01	-2	0.010101	-1.99564	98	1.99123			0				-0.30103	0.095	-1.02228					312.5	0.0032	0.585	-0.232844			Impedence spectroscopy	mechanic milling then heating										995.507	9.95507e-28
Fast ion conduction and its origin in Li6-xPS5-xBr1+x	Fig 2c	Li6-0.5PS5-0.5Br1+0.5	Li6-xPS5-xBr1+x	0.5	-0.30103	1	0	0.99	-0.00436481	99	1.99564	0.01	-2	0.010101	-1.99564	98	1.99123			0				-0.30103	0.095	-1.02228					333.333	0.003	0.585	-0.232844			Impedence spectroscopy	mechanic milling then heating										995.507	9.95507e-28
Fast ion conduction and its origin in Li6-xPS5-xBr1+x	Fig 2c	Li6-0.5PS5-0.5Br1+0.5	Li6-xPS5-xBr1+x	0.5	-0.30103	1	0	0.99	-0.00436481	99	1.99564	0.01	-2	0.010101	-1.99564	98	1.99123			0				-0.30103	0.095	-1.02228					354.61	0.00282	0.585	-0.232844			Impedence spectroscopy	mechanic milling then heating										995.507	9.95507e-28
Fast ion conduction and its origin in Li6-xPS5-xBr1+x	Fig 2c	Li6-0.5PS5-0.5Br1+0.5	Li6-xPS5-xBr1+x	0.5	-0.30103	1	0	0.99	-0.00436481	99	1.99564	0.01	-2	0.010101	-1.99564	98	1.99123			0				-0.30103	0.095	-1.02228					374.532	0.00267	0.585	-0.232844			Impedence spectroscopy	mechanic milling then heating										995.507	9.95507e-28
Fast ion conduction and its origin in Li6-xPS5-xBr1+x	Fig 2c	Li6-0.5PS5-0.5Br1+0.5	Li6-xPS5-xBr1+x	0.5	-0.30103	1	0	0.99	-0.00436481	99	1.99564	0.01	-2	0.010101	-1.99564	98	1.99123			0				-0.30103	0.095	-1.02228					395.257	0.00253	0.585	-0.232844			Impedence spectroscopy	mechanic milling then heating										995.507	9.95507e-28
Fast ion conduction and its origin in Li6-xPS5-xBr1+x	Fig 2c	Li6-0.7PS5-0.7Br1+0.7	Li6-xPS5-xBr1+x	0.714	-0.146302	2.4965	0.397332	0.99	-0.00436481	99	1.99564	0.01	-2	0.010101	-1.99564	96.5035	1.98454			0.397332				-0.146302	0.01	-2					294.118	0.0034	0.714	-0.146302			Impedence spectroscopy	mechanic milling then heating										998.501	9.98501e-28
Fast ion conduction and its origin in Li6-xPS5-xBr1+x	Fig 2c	Li6-0.7PS5-0.7Br1+0.7	Li6-xPS5-xBr1+x	0.714	-0.146302	2.4965	0.397332	0.99	-0.00436481	99	1.99564	0.01	-2	0.010101	-1.99564	96.5035	1.98454			0.397332				-0.146302	0.01	-2					312.5	0.0032	0.714	-0.146302			Impedence spectroscopy	mechanic milling then heating										998.501	9.98501e-28
Fast ion conduction and its origin in Li6-xPS5-xBr1+x	Fig 2c	Li6-0.7PS5-0.7Br1+0.7	Li6-xPS5-xBr1+x	0.714	-0.146302	2.4965	0.397332	0.99	-0.00436481	99	1.99564	0.01	-2	0.010101	-1.99564	96.5035	1.98454			0.397332				-0.146302	0.01	-2					333.333	0.003	0.714	-0.146302			Impedence spectroscopy	mechanic milling then heating										998.501	9.98501e-28
Fast ion conduction and its origin in Li6-xPS5-xBr1+x	Fig 2c	Li6-0.7PS5-0.7Br1+0.7	Li6-xPS5-xBr1+x	0.714	-0.146302	2.4965	0.397332	0.99	-0.00436481	99	1.99564	0.01	-2	0.010101	-1.99564	96.5035	1.98454			0.397332				-0.146302	0.01	-2					354.61	0.00282	0.714	-0.146302			Impedence spectroscopy	mechanic milling then heating										998.501	9.98501e-28
Fast ion conduction and its origin in Li6-xPS5-xBr1+x	Fig 2c	Li6-0.7PS5-0.7Br1+0.7	Li6-xPS5-xBr1+x	0.714	-0.146302	2.4965	0.397332	0.99	-0.00436481	99	1.99564	0.01	-2	0.010101	-1.99564	96.5035	1.98454			0.397332				-0.146302	0.01	-2					374.532	0.00267	0.714	-0.146302			Impedence spectroscopy	mechanic milling then heating										998.501	9.98501e-28
Fast ion conduction and its origin in Li6-xPS5-xBr1+x	Fig 2c	Li6-0.7PS5-0.7Br1+0.7	Li6-xPS5-xBr1+x	0.714	-0.146302	2.4965	0.397332	0.99	-0.00436481	99	1.99564	0.01	-2	0.010101	-1.99564	96.5035	1.98454			0.397332				-0.146302	0.01	-2					395.257	0.00253	0.714	-0.146302			Impedence spectroscopy	mechanic milling then heating										998.501	9.98501e-28
High Lithium Ion Conductivity of Glass–Ceramics Derived from Mechanically Milled Glassy Powders	Figure 1	Li7PS6		0.01	-2	0.010101	-1.99564	0.01	-2	0.010101	-1.99564	0.01	-2	0.010101	-1.99564	0.01	-2			-1.99564				-2	0.01	-2		Li7PS6		crystalline	317.46	0.00315	1	0			Impedence spectroscopy	mechanic milling then heating					370000000	8.5682
High Lithium Ion Conductivity of Glass–Ceramics Derived from Mechanically Milled Glassy Powders	Figure 1	Li7PS6		0.01	-2	0.010101	-1.99564	0.01	-2	0.010101	-1.99564	0.01	-2	0.010101	-1.99564	0.01	-2			-1.99564				-2	0.01	-2		Li7PS7		crystalline	327.869	0.00305	1	0			Impedence spectroscopy	mechanic milling then heating					370000000	8.5682
High Lithium Ion Conductivity of Glass–Ceramics Derived from Mechanically Milled Glassy Powders	Figure 1	Li7PS6		0.01	-2	0.010101	-1.99564	0.01	-2	0.010101	-1.99564	0.01	-2	0.010101	-1.99564	0.01	-2			-1.99564				-2	0.01	-2		Li7PS8		crystalline	348.432	0.00287	1	0			Impedence spectroscopy	mechanic milling then heating					370000000	8.5682
High Lithium Ion Conductivity of Glass–Ceramics Derived from Mechanically Milled Glassy Powders	Figure 1	Li7PS6		0.01	-2	0.010101	-1.99564	0.01	-2	0.010101	-1.99564	0.01	-2	0.010101	-1.99564	0.01	-2			-1.99564				-2	0.01	-2		Li7PS9		crystalline	369.004	0.00271	1	0			Impedence spectroscopy	mechanic milling then heating					370000000	8.5682
High Lithium Ion Conductivity of Glass–Ceramics Derived from Mechanically Milled Glassy Powders	Figure 1	Li7PS6		0.01	-2	0.010101	-1.99564	0.01	-2	0.010101	-1.99564	0.01	-2	0.010101	-1.99564	0.01	-2			-1.99564				-2	0.01	-2		Li7PS10		crystalline	389.105	0.00257	1	0			Impedence spectroscopy	mechanic milling then heating					370000000	8.5682
High Lithium Ion Conductivity of Glass–Ceramics Derived from Mechanically Milled Glassy Powders	Figure 1	Li7PS6		0.01	-2	0.010101	-1.99564	0.01	-2	0.010101	-1.99564	0.01	-2	0.010101	-1.99564	0.01	-2			-1.99564				-2	0.01	-2		Li7PS11		crystalline	408.163	0.00245	1	0			Impedence spectroscopy	mechanic milling then heating					370000000	8.5682
High Lithium Ion Conductivity of Glass–Ceramics Derived from Mechanically Milled Glassy Powders	Figure 1	Li7PS6		0.01	-2	0.010101	-1.99564	0.01	-2	0.010101	-1.99564	0.01	-2	0.010101	-1.99564	0.01	-2			-1.99564				-2	0.01	-2		Li7PS12		crystalline	430.108	0.002325	1	0			Impedence spectroscopy	mechanic milling then heating					370000000	8.5682
High Lithium Ion Conductivity of Glass–Ceramics Derived from Mechanically Milled Glassy Powders	Figure 1	Li7PS6		0.01	-2	0.010101	-1.99564	0.01	-2	0.010101	-1.99564	0.01	-2	0.010101	-1.99564	0.01	-2			-1.99564				-2	0.01	-2		Li7PS13		crystalline	452.489	0.00221	1	0			Impedence spectroscopy	mechanic milling then heating					370000000	8.5682
High Lithium Ion Conductivity of Glass–Ceramics Derived from Mechanically Milled Glassy Powders	Figure 1	Li7PS6		0.01	-2	0.010101	-1.99564	0.01	-2	0.010101	-1.99564	0.01	-2	0.010101	-1.99564	0.01	-2			-1.99564				-2	0.01	-2		Li7PS14		crystalline	473.934	0.00211	1	0			Impedence spectroscopy	mechanic milling then heating					370000000	8.5682
High Lithium Ion Conductivity of Glass–Ceramics Derived from Mechanically Milled Glassy Powders	Figure 1	Li7PS6		0.01	-2	0.010101	-1.99564	0.01	-2	0.010101	-1.99564	0.01	-2	0.010101	-1.99564	0.01	-2			-1.99564				-2	0.01	-2		Li7PS15		crystalline	495.05	0.00202	1	0			Impedence spectroscopy	mechanic milling then heating					370000000	8.5682
High Lithium Ion Conductivity of Glass–Ceramics Derived from Mechanically Milled Glassy Powders	Figure 1	Li7PS6		0.01	-2	0.010101	-1.99564	0.01	-2	0.010101	-1.99564	0.01	-2	0.010101	-1.99564	0.01	-2			-1.99564				-2	0.01	-2		Li7PS16		crystalline	515.464	0.00194	1	0			Impedence spectroscopy	mechanic milling then heating					370000000	8.5682
High Lithium Ion Conductivity of Glass–Ceramics Derived from Mechanically Milled Glassy Powders	Figure 1	Li7PS6		0.01	-2	0.010101	-1.99564	0.01	-2	0.010101	-1.99564	0.01	-2	0.010101	-1.99564	0.01	-2			-1.99564				-2	0.01	-2		Li7PS17		crystalline	523.56	0.00191	1	0			Impedence spectroscopy	mechanic milling then heating					370000000	8.5682
[truncated: 26 more columns]
